# Supplementary material for: The radical scavenging activity of monocaffeoylquinic acids: the role of neighboring hydroxyl groups and pH levels
Source: Royal Society of Chemistry journal article supplement (doi:10.1039/d3ra08460d), 2024-01-01
Supplement: d3ra08460d1.pdf [file d3ra08460d1.pdf]

## Supporting Information (SI)

---

### The radical scavenging activity of monocaffeoylquinic acids: The role of neighboring hydroxyl groups and pH levels

Quan V. Vo,<sup>1\*</sup> Duong Thi Thuy Hoa<sup>2</sup>, Nguyen Thi Hoa<sup>1</sup>, Tran Duc Manh<sup>2</sup> and Adam Mechler<sup>3</sup>

<sup>1</sup>*The University of Danang - University of Technology and Education, Danang 550000, Vietnam.*

<sup>2</sup>*The University of Danang - University of Sciences and Education, Danang 550000, Vietnam.*

<sup>3</sup>*Department of Chemistry and Physics, La Trobe University, Victoria 3086, Australia.*

\*Corresponding authors: [vvquan@ute.udn.vn](mailto:vvquan@ute.udn.vn)

#### Table of Contents

|                                                                                                                                                                                                       |     |
|-------------------------------------------------------------------------------------------------------------------------------------------------------------------------------------------------------|-----|
| Table S1. The method to calculate rate constant following the conventional transition state theory .....                                                                                              | S2  |
| Table S2. BDEs, PAs, and IEs (kcal/mol) of the CQAs and $\Delta G^\circ$ (kcal/mol) of the CQAs + HOO <sup>*</sup> reactions in the examined media according to the FHT, SET, and PL mechanisms. .... | S4  |
| Table S3. Selected BCP intermolecular contact parameters for the TSs-O6'-H-OOH .....                                                                                                                  | S6  |
| Figure S1. The IRC plots for the transition states of CQAs + HOO <sup>*</sup> reactions.....                                                                                                          | S8  |
| Figure S2. The typical conformers of CQA and the relative free energies $\Delta G^\circ$ (in kcal/mol) compared with CQA conformers (3CQA, 4CQA, 5CQA).....                                           | S9  |
| Table S4: The Cartesian coordinates and energies of transition states of the reaction between the CQAs with HOO <sup>*</sup> in the studied media (P: pentyl ethanoate; W: water) .....               | S10 |
| References .....                                                                                                                                                                                      | S24 |

**Table S1. The method to calculate rate constant following the conventional transition state theory**

The rate constant ( $k$ ) was calculated by using the conventional transition state theory (TST) (at 298.15 K, 1M standard state) according to the equation (1):<sup>1-5</sup>

$$k = \sigma \kappa \frac{k_B T}{h} e^{-(\Delta G^\ddagger)/RT} \quad (1)$$

Where:  $\sigma$  is the reaction symmetry number,<sup>6,7</sup>

$\kappa$  contains the tunneling corrections calculated using the Eckart barrier,<sup>8</sup>

$k_B$  is the Boltzmann constant,

$h$  is the Planck constant,

$\Delta G^\ddagger$  is the Gibbs free energy of activation.

The Marcus Theory was used to estimate the reaction barriers of SET reactions.<sup>9-12</sup> The free energy of reaction  $\Delta G^\ddagger$  for the SET pathway was computed following the equations (2,3).

$$\Delta G_{\text{SET}}^\ddagger = \frac{\lambda}{4} \left( 1 + \frac{\Delta G_{\text{SET}}^0}{\lambda} \right)^2 \quad (2)$$

$$\lambda \approx \Delta E_{\text{SET}} - \Delta G_{\text{SET}}^0 \quad (3)$$

where  $\Delta G_{\text{SET}}$  is the Gibbs energy of reaction,  $\Delta E_{\text{SET}}$  is the non-adiabatic energy difference between reactants and vertical products for SET.<sup>13,14</sup>

For rate constants that were close to the diffusion limit a correction was applied to yield realistic results<sup>15</sup>. The apparent rate constants ( $k_{\text{app}}$ ) were calculated following the Collins–Kimball theory in the solvents at 298.15K;<sup>16</sup> the steady-state Smoluchowski rate constant ( $k_D$ ) for an irreversible bimolecular diffusion–controlled reaction was calculated following the literature as corroding to equations (4,5).<sup>15,17</sup>

$$k_{\text{app}} = \frac{k_{\text{TST}} k_D}{k_{\text{TST}} + k_D} \quad (4)$$

$$k_D = 4\pi R_{AB} D_{AB} N_A \quad (5)$$

where  $R_{AB}$  is the reaction distance,  $N_A$  is the Avogadro constant, and  $D_{AB} = D_A + D_B$  ( $D_{AB}$  is the mutual diffusion coefficient of the reactants A and B),<sup>16,18</sup> where  $D_A$  or  $D_B$  is estimated using the

Stokes–Einstein formulation (6).<sup>19,20</sup>

$$D_{A \text{ or } B} = \frac{k_B T}{6\pi\eta a_{A \text{ or } B}} \quad (6)$$

$\eta$  is the viscosity of the solvents (i.e.  $\eta(\text{H}_2\text{O}) = 8.91 \times 10^{-4} \text{ Pa s}$ ,  $\eta(\text{pentyl ethanoate}) = 8.62 \times 10^{-4} \text{ Pa s}$ ) and  $a$  is the radius of the solute.

The kinetic study requires different considerations. Water (dielectric constants,  $\epsilon = 78.35$ ) and pentyl ethanoate ( $\epsilon = 4.73$ ) are the *de facto* standard solvents in the literature to mimic the polar and nonpolar environments in the human body.<sup>15,21-23</sup> Thus, these solvents were used to model the physiological environments. All transition states were characterized by the existence of only one single imaginary frequency. Intrinsic coordinate calculations (IRCs) were performed to ensure that each transition state is connected correctly with the pre-complex and post-complex.

**Table S2. BDEs, PAs, and IEs (kcal/mol) of the CQAs and  $\Delta G^\circ$  (kcal/mol) of the CQAs + HOO<sup>•</sup> reactions in the examined media according to the FHT, SET, and PL mechanisms.**

| Comp.       | positions | Pentyl ethanoate |                  |       |                  |       |                  | water |                  |      |                  |       |                  |
|-------------|-----------|------------------|------------------|-------|------------------|-------|------------------|-------|------------------|------|------------------|-------|------------------|
|             |           | FHT              |                  | PL    |                  | SET   |                  | FHT   |                  | PL   |                  | SET   |                  |
|             |           | BDE              | $\Delta G^\circ$ | PA    | $\Delta G^\circ$ | IE    | $\Delta G^\circ$ | BDE   | $\Delta G^\circ$ | PA   | $\Delta G^\circ$ | IE    | $\Delta G^\circ$ |
| <b>3CQA</b> | C2-RAD    | 99.8             | 13.3             |       |                  | 136.9 | 74.5             | 100.6 | 10.8             |      |                  | 103.3 | 22.8             |
|             | C3-RAD    | 95.9             | 8.9              |       |                  |       |                  | 97.5  | 7.3              |      |                  |       |                  |
|             | C4-RAD    | 94.4             | 7.7              |       |                  |       |                  | 96.5  | 6.5              |      |                  |       |                  |
|             | C5-RAD    | 96.8             | 10.2             |       |                  |       |                  | 98.3  | 8.4              |      |                  |       |                  |
|             | C6-RAD    | 101.4            | 14.8             |       |                  |       |                  | 102.6 | 12.7             |      |                  |       |                  |
|             | COO-RAD   | 113.8            | 27.5             | 66.7  | 85.2             |       |                  | 111.7 | 22.1             | 30.9 | 38.5             |       |                  |
|             | O1-RAD    | 108.3            | 22.2             | 89.0  | 107.2            |       |                  | 127.8 | 38.4             | 50.3 | 57.6             |       |                  |
|             | O4-RAD    | 106.4            | 20.3             | 104.1 | 122.9            |       |                  | 108.5 | 19.2             | 58.8 | 66.6             |       |                  |
|             | O5-RAD    | 106.6            | 20.4             | 104.8 | 122.2            |       |                  | 107.5 | 18.0             | 59.1 | 65.7             |       |                  |
|             | O61-RAD   | 81.1             | -4.4             | 77.3  | 96.4             |       |                  | 84.5  | -4.2             | 42.9 | 51.0             |       |                  |
| O71-RAD     | 79.1      | -6.2             | 73.7             | 92.9  | 82.8             | -5.8  | 40.8             | 49.1  |                  |      |                  |       |                  |
| <b>4CQA</b> | C2-RAD    | 97.3             | 11.1             |       |                  | 130.3 | 68.2             | 97.7  | 8.2              |      |                  | 93.5  | 13.2             |
|             | C3-RAD    | 92.1             | 4.9              |       |                  |       |                  | 93.8  | 3.4              |      |                  |       |                  |
|             | C4-RAD    | 91.3             | 3.3              |       |                  |       |                  | 92.8  | 1.5              |      |                  |       |                  |
|             | C5-RAD    | 88.3             | 1.7              |       |                  |       |                  | 90.2  | 0.4              |      |                  |       |                  |
|             | C6-RAD    | 97.3             | 11.1             |       |                  |       |                  | 97.7  | 8.2              |      |                  |       |                  |
|             | COO-RAD   | 114.1            | 27.3             | 55.7  | 74.2             |       |                  | 112.3 | 22.3             | 27.2 | 34.7             |       |                  |
|             | O1-RAD    | 106.1            | 20.2             | 89.8  | 107.6            |       |                  | 130.4 | 41.2             | 51.3 | 58.1             |       |                  |
|             | O3-RAD    | 107.5            | 20.4             | 88.7  | 108.6            |       |                  | 108.8 | 18.5             | 49.3 | 58.3             |       |                  |
|             | O5-RAD    | 105.4            | 19.0             | 97.7  | 116.7            |       |                  | 108.0 | 18.3             | 55.2 | 63.3             |       |                  |
|             | O61-RAD   | 81.3             | -4.3             | 76.5  | 95.2             |       |                  | 84.5  | -4.4             | 43.2 | 51.0             |       |                  |
| O71-RAD     | 79.4      | -5.9             | 72.6             | 91.5  | 82.7             | -5.9  | 41.2             | 49.3  |                  |      |                  |       |                  |
| <b>5CQA</b> | C2-RAD    | 99.3             | 12.8             |       |                  | 139.6 | 76.9             | 100.3 | 10.5             |      |                  | 102.1 | 21.3             |
|             | C3-RAD    | 93.3             | 7.5              |       |                  |       |                  | 95.7  | 6.6              |      |                  |       |                  |
|             | C4-RAD    | 95.9             | 10.4             |       |                  |       |                  | 98.0  | 9.1              |      |                  |       |                  |
|             | C5-RAD    | 98.5             | 11.7             |       |                  |       |                  | 99.5  | 9.4              |      |                  |       |                  |
|             | C6-RAD    | 99.5             | 12.7             |       |                  |       |                  | 100.7 | 10.7             |      |                  |       |                  |
|             | COO-RAD   | 113.9            | 27.9             | 64.0  | 82.7             |       |                  | 114.4 | 25.2             | 29.0 | 36.8             |       |                  |
|             | O1-RAD    | 107.0            | 20.6             | 97.8  | 115.2            |       |                  | 131.6 | 42.0             | 54.4 | 60.9             |       |                  |
|             | O3-RAD    | 107.3            | 21.0             | 92.0  | 111.9            |       |                  | 108.9 | 19.4             | 51.7 | 60.7             |       |                  |
|             | O4-RAD    | 104.9            | 19.1             | 104.5 | 122.7            |       |                  | 107.9 | 18.9             | 58.6 | 65.8             |       |                  |
|             | O61-RAD   | 81.9             | -3.9             | 75.4  | 94.0             |       |                  | 85.4  | -3.6             | 42.7 | 50.4             |       |                  |

|  |         |      |      |      |      |  |  |      |      |      |      |  |  |
|--|---------|------|------|------|------|--|--|------|------|------|------|--|--|
|  | O71-RAD | 79.6 | -6.1 | 74.0 | 92.7 |  |  | 83.2 | -5.8 | 40.6 | 48.4 |  |  |
|--|---------|------|------|------|------|--|--|------|------|------|------|--|--|

Table S3. Selected BCP intermolecular contact parameters for the TSs-O6'-H-OOH

| Contacts                      | $\rho(r)$<br>(au) | $\nabla^2\rho(r)$<br>(au) | $G(r)^a)$<br>(au) | $V(r)^b) (au)$ | $G(r)/ V(r) $ | $H(r)^c) (au)$ | $E_{HB}^d)$<br>(kcal/.mol) |
|-------------------------------|-------------------|---------------------------|-------------------|----------------|---------------|----------------|----------------------------|
| <b>3CQA-ANION-O6'-H-OOH</b>   |                   |                           |                   |                |               |                |                            |
| O6'...H41                     | 0.2322            | 0.9017                    | 0.0894            | -0.4135        | 0.2163        | -0.3241        | -129.7                     |
| O44...H41                     | 0.1262            | 0.0485                    | 0.0832            | -0.1543        | 0.5393        | -0.0711        | -48.4                      |
| C6'...O45                     | 0.0182            | 0.0584                    | 0.0135            | -0.0123        | 1.0908        | 0.0011         | -3.9                       |
| RCP                           | 0.0156            | 0.0765                    | 0.0171            | -0.0151        | 1.1341        | 0.0020         | -4.7                       |
| <b>3CQA-DIANION-O6'-H-OOH</b> |                   |                           |                   |                |               |                |                            |
| O6'...H41                     | 0.2008            | -0.6287                   | 0.1027            | -0.3626        | 0.2833        | -0.2599        | -113.8                     |
| O43...H41                     | 0.1551            | -0.1450                   | 0.0914            | -0.2191        | 0.4173        | -0.1277        | -68.7                      |
| O7'...H42                     | 0.0751            | 0.1730                    | 0.0653            | -0.0874        | 0.7473        | -0.0221        | -27.4                      |
| RCP                           | 0.0105            | 0.0485                    | 0.0108            | -0.0096        | 1.1331        | 0.0013         | -3.0                       |
| <b>4CQA-ANION-O6'-H-OOH</b>   |                   |                           |                   |                |               |                |                            |
| O6'...H41                     | 0.2322            | -0.9399                   | 0.0893            | -0.4136        | 0.2160        | -0.3243        | -129.8                     |
| O44...H41                     | 0.1260            | 0.0488                    | 0.0831            | -0.1540        | 0.5396        | -0.0709        | -48.3                      |
| C6'...O45                     | 0.0181            | 0.0584                    | 0.0134            | -0.0122        | 1.0966        | 0.0012         | -3.8                       |
| RCP                           | 0.0155            | 0.0760                    | 0.0170            | -0.0150        | 1.1345        | 0.0020         | -4.7                       |

| <b>4CQA-DIANION-O6'-H-OOH</b>                                                                                                                             |        |         |        |         |        |         |        |
|-----------------------------------------------------------------------------------------------------------------------------------------------------------|--------|---------|--------|---------|--------|---------|--------|
| O6'...H41                                                                                                                                                 | 0.1990 | -0.6012 | 0.1033 | -0.3568 | 0.2894 | -0.2536 | -112.0 |
| O43...H41                                                                                                                                                 | 0.1573 | -0.1615 | 0.0918 | -0.2239 | 0.4098 | -0.1322 | -70.3  |
| O7'...H42                                                                                                                                                 | 0.0740 | 0.1729  | 0.0645 | -0.0858 | 0.7518 | -0.0213 | -26.9  |
| RCP                                                                                                                                                       | 0.0105 | 0.0484  | 0.0108 | -0.0096 | 1.1332 | 0.0013  | -3.0   |
| <b>5CQA-ANION-O6'-H-OOH</b>                                                                                                                               |        |         |        |         |        |         |        |
| O6'...H41                                                                                                                                                 | 0.2285 | -0.8867 | 0.0900 | -0.4017 | 0.2241 | -0.3117 | -126.0 |
| O44...H41                                                                                                                                                 | 0.1293 | 0.0357  | 0.0842 | -0.1594 | 0.5280 | -0.0753 | -50.0  |
| C6'...O45                                                                                                                                                 | 0.0182 | 0.0590  | 0.0135 | -0.0123 | 1.0981 | 0.0012  | -3.9   |
| RCP                                                                                                                                                       | 0.0156 | 0.0765  | 0.0171 | -0.0151 | 1.1343 | 0.0020  | -4.7   |
| <b>5CQA-DIANION-O6'-H-OOH</b>                                                                                                                             |        |         |        |         |        |         |        |
| O6'...H41                                                                                                                                                 | 0.1926 | -0.5154 | 0.1041 | -0.3371 | 0.3089 | -0.2330 | -105.8 |
| O43...H41                                                                                                                                                 | 0.1632 | -0.2127 | 0.0922 | -0.2376 | 0.3881 | -0.1454 | -74.5  |
| O7'...H42                                                                                                                                                 | 0.0754 | 0.1733  | 0.0656 | -0.0879 | 0.7465 | -0.0223 | -27.6  |
| RCP                                                                                                                                                       | 0.0107 | 0.0490  | 0.0110 | -0.0097 | 1.1300 | 0.0013  | -3.1   |
| a) electron kinetic energy density; b) electron potential energy density; c) total electron energy density; d) individual energies of each hydrogen bond. |        |         |        |         |        |         |        |

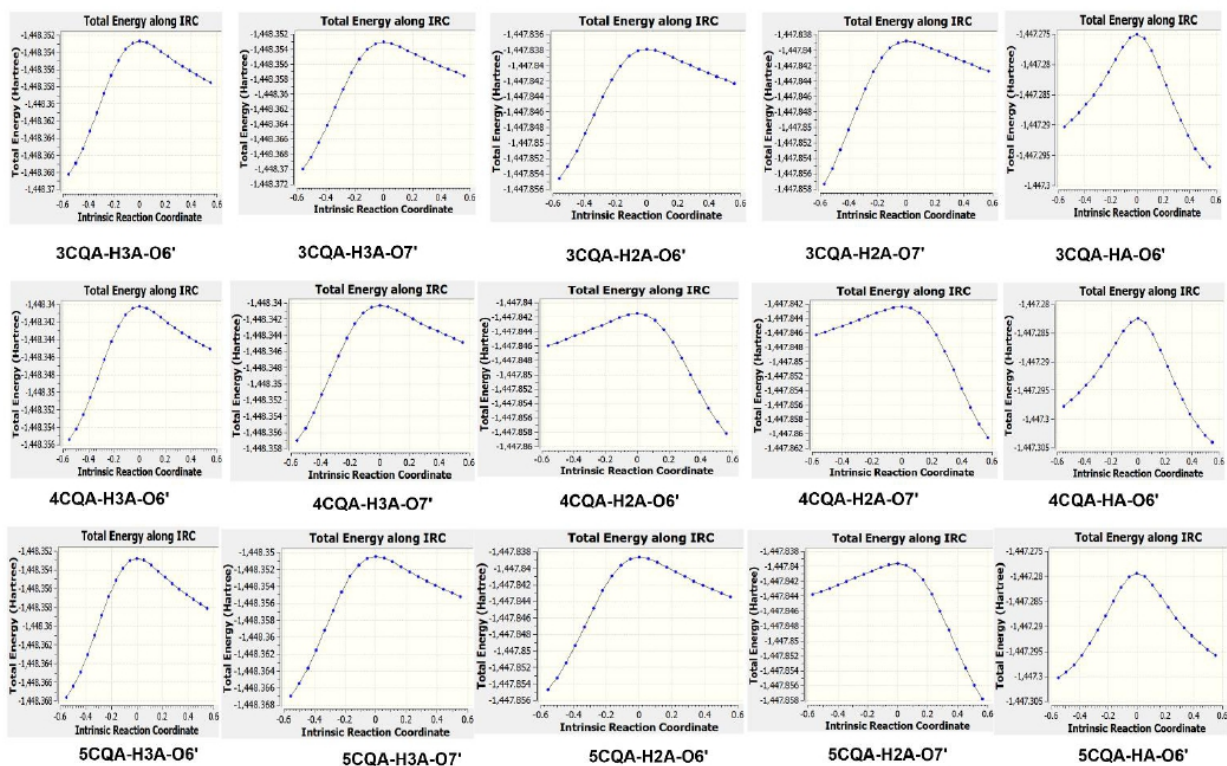

**Figure S1. The IRC plots for the transition states of CQAs + HOO\* reactions.**



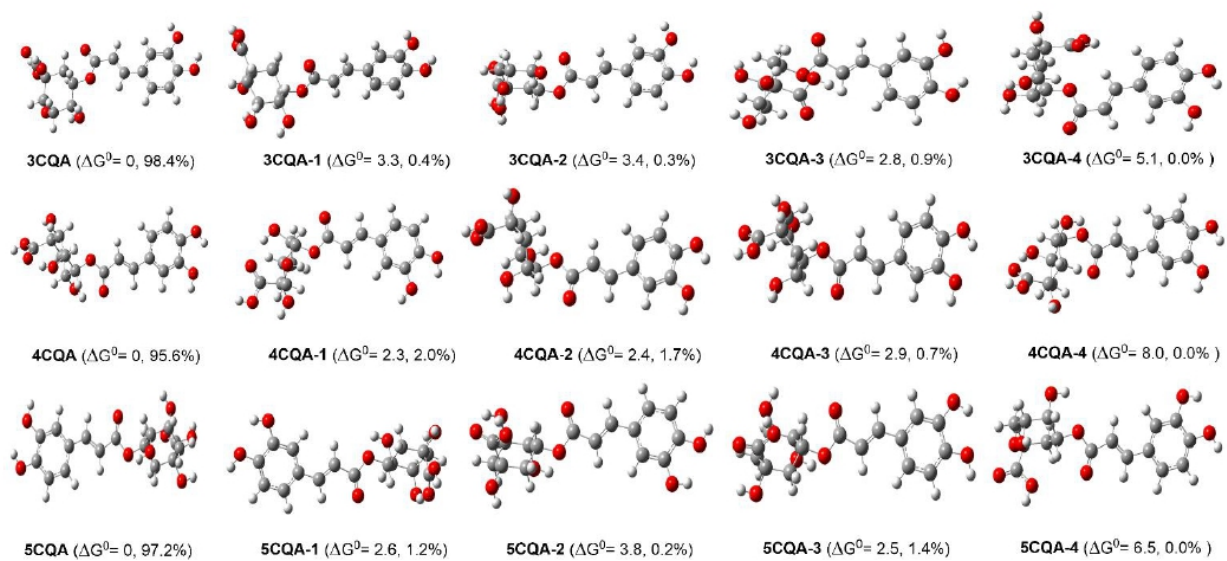

**Figure S2. The typical conformers of CQA and the relative free energies  $\Delta G^{\circ}$  (in kcal/mol) compared with CQA conformers (3CQA, 4CQA, 5CQA)**

**Table S4: The Cartesian coordinates and energies of transition states of the reaction between the COAs with HOO\* in the studied media (P: pentyl ethanoate; W: water)**

| Name                  |             |             |             | 3CQA-O6'-H-OOH-P                             |              |
|-----------------------|-------------|-------------|-------------|----------------------------------------------|--------------|
| Cartesian Coordinates |             |             |             | Frequency and Energy                         |              |
| O                     | 1.39807900  | -0.84195200 | 0.73943600  | Zero-point correction=                       | 0.351552     |
| O                     | 5.43114500  | 0.16832800  | 1.36928400  | (Hartree/Particle)                           |              |
| O                     | 2.77676800  | -2.85098600 | -0.74976100 | Thermal correction to Energy=                | 0.377817     |
| O                     | 5.35064000  | -2.26039200 | 0.01674100  | Thermal correction to Enthalpy=              | 0.378762     |
| O                     | 5.44937700  | 2.77953900  | 1.31510400  | Thermal correction to Gibbs Free Energy=     | 0.291733     |
| O                     | 5.23836500  | 2.85049800  | -0.91138900 | Sum of electronic and zero-point Energies=   | -1448.040192 |
| O                     | 0.74357400  | 0.15291900  | -1.17532700 | Sum of electronic and thermal Energies=      | -1448.013926 |
| O                     | -6.64098400 | 0.27123700  | -1.41572800 | Sum of electronic and thermal Enthalpies=    | -1448.012982 |
| O                     | -7.37053400 | -0.95431800 | 0.86646600  | Sum of electronic and thermal Free Energies= | -            |
| C                     | 4.79568500  | 0.76611800  | 0.24381400  | 1448.100010                                  |              |
| C                     | 2.80013000  | -0.73343200 | 0.43850600  |                                              |              |
| C                     | 3.26326800  | 0.72123300  | 0.38498800  |                                              |              |
| C                     | 5.24614600  | -0.01421300 | -0.99020100 |                                              |              |
| C                     | 3.20734200  | -1.51012200 | -0.81624300 |                                              |              |
| C                     | 4.73295100  | -1.45102300 | -0.98094300 |                                              |              |
| C                     | 5.19876800  | 2.23471600  | 0.11677500  |                                              |              |
| C                     | 0.48131700  | -0.39909000 | -0.13353500 |                                              |              |
| C                     | -0.88292000 | -0.67212300 | 0.36969600  |                                              |              |
| C                     | -1.94053800 | -0.27827000 | -0.34770200 |                                              |              |
| C                     | -3.35126700 | -0.46369700 | -0.00679200 |                                              |              |
| C                     | -4.31575600 | 0.00454300  | -0.88738800 |                                              |              |
| C                     | -3.77194600 | -1.10659200 | 1.18359800  |                                              |              |
| C                     | -5.68256600 | -0.15008100 | -0.60530900 |                                              |              |
| C                     | -5.10733400 | -1.27645200 | 1.48181500  |                                              |              |
| C                     | -6.07547800 | -0.80002000 | 0.59530300  |                                              |              |
| H                     | 3.25873300  | -1.22213100 | 1.30164100  |                                              |              |
| H                     | 2.81349800  | 1.23268200  | -0.46821300 |                                              |              |
| H                     | 2.95739300  | 1.23860000  | 1.29993800  |                                              |              |
| H                     | 6.33749700  | -0.00956900 | -1.04701900 |                                              |              |
| H                     | 4.86031700  | 0.49334700  | -1.87641300 |                                              |              |
| H                     | 2.73998600  | -1.06384300 | -1.69484100 |                                              |              |
| H                     | 4.97620700  | -1.92212700 | -1.93584100 |                                              |              |
| H                     | 5.25670800  | 0.69407800  | 2.15978000  |                                              |              |
| H                     | 3.40274500  | -3.31233600 | -0.17582200 |                                              |              |
| H                     | 5.53037000  | -1.70554900 | 0.78680400  |                                              |              |
| H                     | 5.65289800  | 3.72053500  | 1.19510600  |                                              |              |
| H                     | -0.95961900 | -1.19377000 | 1.31547700  |                                              |              |
| H                     | -1.74663300 | 0.23206700  | -1.28842900 |                                              |              |
| H                     | -4.03410700 | 0.49525600  | -1.81371700 |                                              |              |
| H                     | -3.03247600 | -1.47839600 | 1.88271000  |                                              |              |
| H                     | -5.42337200 | -1.76950300 | 2.39293200  |                                              |              |
| H                     | -6.78461300 | 1.35069000  | -1.25009100 |                                              |              |
| H                     | -7.88003800 | -0.58774800 | 0.12586200  |                                              |              |
| H                     | -5.20767800 | 2.47652100  | 0.31606700  |                                              |              |
| O                     | -6.76323300 | 2.52830600  | -0.71497200 |                                              |              |

|                              |             |             |             |                                                         |
|------------------------------|-------------|-------------|-------------|---------------------------------------------------------|
| O                            | -6.15127500 | 2.29460000  | 0.47211600  |                                                         |
| <b>Name</b>                  |             |             |             | <b>3CQA-O7'-H-OOH-P</b>                                 |
| <b>Cartesian Coordinates</b> |             |             |             | <b>Frequency and Energy</b>                             |
| O                            | -1.38916300 | 0.54916200  | 0.78192500  | Zero-point correction= 0.351542                         |
| O                            | -5.52375200 | 0.05656000  | 1.36899100  | (Hartree/Particle)                                      |
| O                            | -2.48269300 | 2.84200300  | -0.52279200 | Thermal correction to Energy= 0.377821                  |
| O                            | -5.11494600 | 2.54732800  | 0.20737400  | Thermal correction to Enthalpy= 0.378765                |
| O                            | -5.90354400 | -2.51302700 | 1.11916600  | Thermal correction to Gibbs Free Energy= 0.291849       |
| O                            | -5.69515200 | -2.44713800 | -1.10800700 | Sum of electronic and zero-point Energies= -1448.040407 |
| O                            | -0.87357700 | -0.37008200 | -1.21215700 | Sum of electronic and thermal Energies= -1448.014128    |
| O                            | 6.33222500  | -1.80180800 | -1.38626300 | Sum of electronic and thermal Enthalpies= -1448.013184  |
| O                            | 7.27826500  | -0.70088600 | 0.88584700  | Sum of electronic and thermal Free Energies= -          |
| C                            | -4.97469400 | -0.53523900 | 0.19609900  | 1448.100099                                             |
| C                            | -2.79372200 | 0.65753500  | 0.48978000  |                                                         |
| C                            | -3.45078600 | -0.71156200 | 0.32667700  |                                                         |
| C                            | -5.31152000 | 0.39191700  | -0.97080800 |                                                         |
| C                            | -3.08938400 | 1.58086500  | -0.69475800 |                                                         |
| C                            | -4.60839500 | 1.74107600  | -0.85354100 |                                                         |
| C                            | -5.57538600 | -1.92088900 | -0.03731100 |                                                         |
| C                            | -0.54303900 | 0.05290600  | -0.13094700 |                                                         |
| C                            | 0.84548600  | 0.08794100  | 0.38405900  |                                                         |
| C                            | 1.83978500  | -0.40804600 | -0.36031300 |                                                         |
| C                            | 3.25586900  | -0.45364500 | 0.00542000  |                                                         |
| C                            | 4.13455300  | -1.10350000 | -0.86115800 |                                                         |
| C                            | 3.74827000  | 0.13200500  | 1.19624200  |                                                         |
| C                            | 5.48809700  | -1.17756400 | -0.55803600 |                                                         |
| C                            | 5.08584500  | 0.06224700  | 1.50498700  |                                                         |
| C                            | 5.98332700  | -0.59130100 | 0.63587900  |                                                         |
| H                            | -3.17990800 | 1.13257700  | 1.39473900  |                                                         |
| H                            | -3.07404700 | -1.21108300 | -0.56796900 |                                                         |
| H                            | -3.21980100 | -1.33592300 | 1.19560500  |                                                         |
| H                            | -6.39326500 | 0.53973200  | -1.01937100 |                                                         |
| H                            | -4.99515400 | -0.09296000 | -1.89640900 |                                                         |
| H                            | -2.68297900 | 1.14842700  | -1.60978500 |                                                         |
| H                            | -4.78171700 | 2.31309200  | -1.76768100 |                                                         |
| H                            | -5.42712500 | -0.54779800 | 2.11543700  |                                                         |
| H                            | -3.04746100 | 3.33725000  | 0.08540900  |                                                         |
| H                            | -5.37028000 | 1.96415300  | 0.93403700  |                                                         |
| H                            | -6.23348100 | -3.40596500 | 0.93167400  |                                                         |
| H                            | 0.99088500  | 0.51882100  | 1.36672200  |                                                         |
| H                            | 1.58377700  | -0.82816000 | -1.32995300 |                                                         |
| H                            | 3.77378800  | -1.55287700 | -1.77934800 |                                                         |
| H                            | 3.07122300  | 0.64005500  | 1.87117100  |                                                         |
| H                            | 5.48086300  | 0.50015100  | 2.41508200  |                                                         |
| H                            | 7.21821200  | -1.76999000 | -0.99293900 |                                                         |
| H                            | 7.76207400  | 0.24566200  | 0.62767000  |                                                         |
| H                            | 6.26456500  | 2.10258100  | -0.11601200 |                                                         |
| O                            | 7.98893200  | 1.41982100  | 0.09930600  |                                                         |
| O                            | 6.89015400  | 1.60229000  | -0.66985600 |                                                         |

| Name                  |             |             |             | 3CQA-HA-06'-H-OOH-W                          |              |
|-----------------------|-------------|-------------|-------------|----------------------------------------------|--------------|
| Cartesian Coordinates |             |             |             | Frequency and Energy                         |              |
| O                     | 1.43993400  | -0.79221900 | 0.72140200  | Zero-point correction=                       | 0.337209     |
| O                     | 5.41576200  | 0.16818200  | 1.42475000  | (Hartree/Particle)                           |              |
| O                     | 2.80768500  | -2.79129600 | -0.77589300 | Thermal correction to Energy=                | 0.363276     |
| O                     | 5.41370300  | -2.20385100 | -0.00092300 | Thermal correction to Enthalpy=              | 0.364220     |
| O                     | 6.19806200  | 2.58813400  | 1.08109600  | Thermal correction to Gibbs Free Energy=     | 0.277766     |
| O                     | 4.91258200  | 2.98470000  | -0.71061700 | Sum of electronic and zero-point Energies=   | -1447.622799 |
| O                     | 0.77567100  | 0.17799400  | -1.20372100 | Sum of electronic and thermal Energies=      | -1447.596733 |
| O                     | -6.61166000 | -0.03204300 | -1.48596600 | Sum of electronic and thermal Enthalpies=    | -1447.595789 |
| O                     | -7.31310100 | -0.79375700 | 1.03827700  | Sum of electronic and thermal Free Energies= | -            |
| C                     | 4.85016800  | 0.79950800  | 0.27200000  | 1447.682242                                  |              |
| C                     | 2.85165700  | -0.67987000 | 0.42768900  |                                              |              |
| C                     | 3.32311600  | 0.76923000  | 0.39428800  |                                              |              |
| C                     | 5.29169400  | 0.04227200  | -0.98868700 |                                              |              |
| C                     | 3.25896000  | -1.44734000 | -0.82988600 |                                              |              |
| C                     | 4.78365300  | -1.39653000 | -0.99844300 |                                              |              |
| C                     | 5.35892700  | 2.25960100  | 0.20466000  |                                              |              |
| C                     | 0.51594700  | -0.34032800 | -0.13714900 |                                              |              |
| C                     | -0.84179600 | -0.56146400 | 0.39620100  |                                              |              |
| C                     | -1.90765300 | -0.24407600 | -0.34825500 |                                              |              |
| C                     | -3.31086900 | -0.39813900 | 0.03267500  |                                              |              |
| C                     | -4.28868500 | -0.11797900 | -0.90917600 |                                              |              |
| C                     | -3.70787100 | -0.81575000 | 1.32788200  |                                              |              |
| C                     | -5.64841900 | -0.26187500 | -0.59597400 |                                              |              |
| C                     | -5.03697500 | -0.94999500 | 1.66482400  |                                              |              |
| C                     | -6.02068300 | -0.67383300 | 0.711175300 |                                              |              |
| H                     | 3.29891000  | -1.18334500 | 1.28804100  |                                              |              |
| H                     | 2.89026500  | 1.29359400  | -0.45786700 |                                              |              |
| H                     | 3.01775400  | 1.27522500  | 1.31383000  |                                              |              |
| H                     | 6.38303100  | 0.04590000  | -1.05694500 |                                              |              |
| H                     | 4.89246300  | 0.55837400  | -1.86508300 |                                              |              |
| H                     | 2.80295400  | -0.99737900 | -1.71150600 |                                              |              |
| H                     | 5.02153200  | -1.86510800 | -1.95573400 |                                              |              |
| H                     | 6.05047100  | 0.81646500  | 1.77601400  |                                              |              |
| H                     | 3.35909700  | -3.24964900 | -0.12652100 |                                              |              |
| H                     | 5.58136500  | -1.63993900 | 0.76957800  |                                              |              |
| H                     | -0.91148800 | -0.98907400 | 1.38848800  |                                              |              |
| H                     | -1.73551900 | 0.16345700  | -1.34159200 |                                              |              |
| H                     | -4.02351600 | 0.20811400  | -1.90909500 |                                              |              |
| H                     | -2.95648200 | -1.02869200 | 2.07856800  |                                              |              |
| H                     | -5.33907000 | -1.26085400 | 2.65728800  |                                              |              |
| H                     | -7.01006500 | 0.97011100  | -1.30815600 |                                              |              |
| H                     | -7.86251500 | -0.58209300 | 0.26631600  |                                              |              |
| H                     | -5.55803700 | 2.52421400  | -0.02077400 |                                              |              |
| O                     | -7.22045900 | 2.16768500  | -0.80808400 |                                              |              |
| O                     | -6.40920200 | 2.15648400  | 0.27827100  |                                              |              |
| Name                  |             |             |             | 3CQA-HA-07'-H-OOH-W                          |              |
| Cartesian Coordinates |             |             |             | Frequency and Energy                         |              |

|                       |             |             |             |                                              |              |
|-----------------------|-------------|-------------|-------------|----------------------------------------------|--------------|
| O                     | -1.39932900 | 0.43570800  | 0.79042200  | Zero-point correction=                       | 0.337795     |
| O                     | -5.48966300 | 0.04216900  | 1.41436800  | (Hartree/Particle)                           |              |
| O                     | -2.41888300 | 2.76437000  | -0.48384500 | Thermal correction to Energy=                | 0.363713     |
| O                     | -5.09047800 | 2.52014600  | 0.24552800  | Thermal correction to Enthalpy=              | 0.364657     |
| O                     | -6.64482800 | -2.16769300 | 0.81632700  | Thermal correction to Gibbs Free Energy=     | 0.278908     |
| O                     | -5.40761100 | -2.58167700 | -1.00501700 | Sum of electronic and zero-point Energies=   | -1447.622267 |
| O                     | -0.87442900 | -0.44944400 | -1.21741200 | Sum of electronic and thermal Energies=      | -1447.596349 |
| O                     | 6.42191800  | -1.30403600 | -1.57493700 | Sum of electronic and thermal Enthalpies=    | -1447.595405 |
| O                     | 7.27451700  | -0.70466200 | 0.95195200  | Sum of electronic and thermal Free Energies= | -            |
| C                     | -5.01472900 | -0.54628800 | 0.19964000  | 1447.681154                                  |              |
| C                     | -2.80902400 | 0.57423600  | 0.49671100  |                                              |              |
| C                     | -3.50341700 | -0.77084200 | 0.31754300  |                                              |              |
| C                     | -5.31666600 | 0.39814300  | -0.97275400 |                                              |              |
| C                     | -3.07573500 | 1.52145100  | -0.67272800 |                                              |              |
| C                     | -4.58740500 | 1.73119200  | -0.83517900 |                                              |              |
| C                     | -5.74766500 | -1.89151100 | -0.01981500 |                                              |              |
| C                     | -0.54924400 | -0.06473200 | -0.11387600 |                                              |              |
| C                     | 0.82820100  | -0.07666800 | 0.42142300  |                                              |              |
| C                     | 1.83966600  | -0.49040400 | -0.35087300 |                                              |              |
| C                     | 3.25001700  | -0.54119700 | 0.03408600  |                                              |              |
| C                     | 4.17797100  | -0.91434100 | -0.93681500 |                                              |              |
| C                     | 3.68906700  | -0.21984900 | 1.34150900  |                                              |              |
| C                     | 5.53136900  | -0.95985700 | -0.62673400 |                                              |              |
| C                     | 5.02572400  | -0.26035100 | 1.65492900  |                                              |              |
| C                     | 5.97325700  | -0.63335300 | 0.68201600  |                                              |              |
| H                     | -3.17973900 | 1.05136600  | 1.40691500  |                                              |              |
| H                     | -3.14971600 | -1.26744700 | -0.58611200 |                                              |              |
| H                     | -3.29224000 | -1.41005900 | 1.17867100  |                                              |              |
| H                     | -6.39405400 | 0.57431000  | -1.03484600 |                                              |              |
| H                     | -4.99416300 | -0.08061800 | -1.90042600 |                                              |              |
| H                     | -2.68813500 | 1.09746800  | -1.59904800 |                                              |              |
| H                     | -4.73872300 | 2.32884800  | -1.73652600 |                                              |              |
| H                     | -6.22160300 | -0.53304900 | 1.69794800  |                                              |              |
| H                     | -2.89946300 | 3.23369200  | 0.21220100  |                                              |              |
| H                     | -5.34579500 | 1.91358800  | 0.95733800  |                                              |              |
| H                     | 0.95666300  | 0.27174300  | 1.43841000  |                                              |              |
| H                     | 1.61477200  | -0.81050000 | -1.36519100 |                                              |              |
| H                     | 3.85780000  | -1.16295600 | -1.94228100 |                                              |              |
| H                     | 2.97169300  | 0.06067700  | 2.10201300  |                                              |              |
| H                     | 5.38298700  | -0.01638200 | 2.64838600  |                                              |              |
| H                     | 7.31330500  | -1.31411300 | -1.19184800 |                                              |              |
| H                     | 7.75972700  | 0.17684100  | 0.54485800  |                                              |              |
| H                     | 6.29709300  | 2.16969400  | 0.19576600  |                                              |              |
| O                     | 7.96704200  | 1.35705100  | -0.03359000 |                                              |              |
| O                     | 6.73094100  | 1.64668400  | -0.50249500 |                                              |              |
| <b>Name</b>           |             |             |             | <b>3CQA-A-O6'-H-OOH-W</b>                    |              |
| Cartesian Coordinates |             |             |             | Frequency and Energy                         |              |
| O                     | 1.52922800  | -0.63425700 | 0.73724800  | Zero-point correction=                       | 0.325042     |
| O                     | 5.55344200  | 0.11545200  | 1.39062300  | (Hartree/Particle)                           |              |

|                              |             |             |             |                                              |              |
|------------------------------|-------------|-------------|-------------|----------------------------------------------|--------------|
| O                            | 2.83854500  | -2.74912600 | -0.69665500 | Thermal correction to Energy=                | 0.347784     |
| O                            | 5.41875200  | -2.22482400 | 0.02356800  | Thermal correction to Enthalpy=              | 0.348728     |
| O                            | 6.42527400  | 2.43539500  | 1.15516400  | Thermal correction to Gibbs Free Energy=     | 0.270799     |
| O                            | 5.33272900  | 2.92803300  | -0.76248200 | Sum of electronic and zero-point Energies=   | -1447.192147 |
| O                            | 0.87479800  | 0.26699400  | -1.22758200 | Sum of electronic and thermal Energies=      | -1447.169405 |
| O                            | -6.45996500 | 0.28766400  | -1.54797900 | Sum of electronic and thermal Enthalpies=    | -1447.168461 |
| O                            | -7.24137600 | -0.66559300 | 0.98246300  | Sum of electronic and thermal Free Energies= | -            |
| C                            | 5.01694300  | 0.77532000  | 0.23893400  | 1447.246390                                  |              |
| C                            | 2.93495900  | -0.58579100 | 0.42355900  |                                              |              |
| C                            | 3.48946600  | 0.83479900  | 0.35052700  |                                              |              |
| C                            | 5.40241600  | -0.00924400 | -1.01882600 |                                              |              |
| C                            | 3.30022700  | -1.41443600 | -0.81179300 |                                              |              |
| C                            | 4.82559700  | -1.42039200 | -0.99873000 |                                              |              |
| C                            | 5.64739600  | 2.21004700  | 0.19198000  |                                              |              |
| C                            | 0.60939800  | -0.20957800 | -0.14815600 |                                              |              |
| C                            | -0.74884600 | -0.41270700 | 0.39246600  |                                              |              |
| C                            | -1.83009900 | -0.07100400 | -0.32857900 |                                              |              |
| C                            | -3.22955400 | -0.22014900 | 0.03982400  |                                              |              |
| C                            | -4.21773200 | 0.15766800  | -0.86593100 |                                              |              |
| C                            | -3.63903800 | -0.75436700 | 1.28935300  |                                              |              |
| C                            | -5.59091500 | 0.00962600  | -0.60659700 |                                              |              |
| C                            | -4.96781700 | -0.89238800 | 1.59298100  |                                              |              |
| C                            | -6.01066500 | -0.52419000 | 0.68300100  |                                              |              |
| H                            | 3.37917100  | -1.07678700 | 1.29357600  |                                              |              |
| H                            | 3.08795000  | 1.37207400  | -0.51033700 |                                              |              |
| H                            | 3.21385400  | 1.37558700  | 1.25999800  |                                              |              |
| H                            | 6.49286300  | -0.06090000 | -1.09603800 |                                              |              |
| H                            | 5.02650900  | 0.54025100  | -1.88574500 |                                              |              |
| H                            | 2.82594100  | -0.98480500 | -1.69476400 |                                              |              |
| H                            | 5.03381600  | -1.93724400 | -1.94117200 |                                              |              |
| H                            | 6.13258000  | 0.83362700  | 1.74581900  |                                              |              |
| H                            | 3.46734200  | -3.18072000 | -0.10461300 |                                              |              |
| H                            | 5.64552500  | -1.61805100 | 0.74905100  |                                              |              |
| H                            | -0.81070500 | -0.85834800 | 1.37680500  |                                              |              |
| H                            | -1.63688700 | 0.36215300  | -1.30843300 |                                              |              |
| H                            | -3.94205500 | 0.56206800  | -1.83498900 |                                              |              |
| H                            | -2.89053900 | -1.05416400 | 2.01439900  |                                              |              |
| H                            | -5.28688900 | -1.29756800 | 2.54723500  |                                              |              |
| H                            | -7.46459000 | 0.69164000  | -1.21256600 |                                              |              |
| H                            | -7.92386500 | 0.65084400  | 0.79255300  |                                              |              |
| O                            | -8.49887800 | 1.30410400  | -0.86379400 |                                              |              |
| O                            | -8.31010400 | 1.54128900  | 0.46756600  |                                              |              |
| <b>Name</b>                  |             |             |             | <b>4CQA-O6'-H-OOH-P</b>                      |              |
| <b>Cartesian Coordinates</b> |             |             |             | <b>Frequency and Energy</b>                  |              |
| O                            | 1.54059300  | -0.32550800 | 0.66207800  | Zero-point correction=                       | 0.351106     |
| O                            | 4.36600000  | 2.10221700  | -1.56592900 | (Hartree/Particle)                           |              |
| O                            | 4.29925000  | -2.36033700 | -0.59042800 | Thermal correction to Energy=                | 0.377346     |
| O                            | 3.28877300  | 0.20688000  | 2.76153900  | Thermal correction to Enthalpy=              | 0.378290     |
| O                            | 6.76305400  | 1.62001500  | -0.66674900 | Thermal correction to Gibbs Free Energy=     | 0.291246     |

|                              |             |             |             |                                              |              |
|------------------------------|-------------|-------------|-------------|----------------------------------------------|--------------|
| O                            | 6.39167000  | -0.56813900 | -0.51891900 | Sum of electronic and zero-point Energies=   | -1448.039066 |
| O                            | 0.40746000  | -2.26623400 | 0.54361200  | Sum of electronic and thermal Energies=      | -1448.012826 |
| O                            | -6.84822300 | -0.72151500 | 0.57503200  | Sum of electronic and thermal Enthalpies=    | -1448.011882 |
| O                            | -6.91056800 | 1.96178300  | 0.34540700  | Sum of electronic and thermal Free Energies= | -            |
| C                            | 4.48961100  | 0.93544500  | -0.77476000 | 1448.098925                                  |              |
| C                            | 2.79469900  | -1.02990100 | 0.73611900  |                                              |              |
| C                            | 3.65308300  | -0.13881600 | -1.48408900 |                                              |              |
| C                            | 3.96345500  | 1.19246500  | 0.65080100  |                                              |              |
| C                            | 3.27900800  | -1.38868800 | -0.67605700 |                                              |              |
| C                            | 3.75103400  | -0.08842900 | 1.45802300  |                                              |              |
| C                            | 5.96589300  | 0.55288400  | -0.65955000 |                                              |              |
| C                            | 0.41230000  | -1.06203200 | 0.57158000  |                                              |              |
| C                            | -0.77510900 | -0.18556200 | 0.51770300  |                                              |              |
| C                            | -1.99681300 | -0.72852200 | 0.46996700  |                                              |              |
| C                            | -3.26918600 | -0.00840900 | 0.42295700  |                                              |              |
| C                            | -4.45044300 | -0.73099900 | 0.50855700  |                                              |              |
| C                            | -3.34054200 | 1.40114600  | 0.30062400  |                                              |              |
| C                            | -5.69444100 | -0.07981000 | 0.48177100  |                                              |              |
| C                            | -4.54795100 | 2.06566700  | 0.27474400  |                                              |              |
| C                            | -5.73538800 | 1.33598800  | 0.36580500  |                                              |              |
| H                            | 2.65790600  | -1.94558600 | 1.31194200  |                                              |              |
| H                            | 4.14093900  | -0.43979600 | -2.41438500 |                                              |              |
| H                            | 2.72389600  | 0.36939700  | -1.75523700 |                                              |              |
| H                            | 3.00449400  | 1.70617000  | 0.53327400  |                                              |              |
| H                            | 4.63860700  | 1.86006100  | 1.19384100  |                                              |              |
| H                            | 2.44650100  | -1.87249200 | -1.19238700 |                                              |              |
| H                            | 4.69845900  | -0.61768600 | 1.59310300  |                                              |              |
| H                            | 4.93158100  | 2.79254500  | -1.19939300 |                                              |              |
| H                            | 5.15226100  | -1.90992900 | -0.51834100 |                                              |              |
| H                            | 2.40612800  | 0.58715600  | 2.67815000  |                                              |              |
| H                            | 7.68060900  | 1.33023800  | -0.53670900 |                                              |              |
| H                            | -0.59583100 | 0.88233800  | 0.53118300  |                                              |              |
| H                            | -2.06546600 | -1.81391000 | 0.47899900  |                                              |              |
| H                            | -4.43822200 | -1.81166700 | 0.60800900  |                                              |              |
| H                            | -2.42750600 | 1.97861600  | 0.21971300  |                                              |              |
| H                            | -4.59741000 | 3.14319000  | 0.17752600  |                                              |              |
| H                            | -7.11519400 | -1.10562600 | -0.42490000 |                                              |              |
| H                            | -7.61050100 | 1.29650600  | 0.44571200  |                                              |              |
| H                            | -5.43766300 | -0.81899600 | -2.24916600 |                                              |              |
| O                            | -7.16109600 | -1.28206300 | -1.70128700 |                                              |              |
| O                            | -6.28551800 | -0.35023400 | -2.15261900 |                                              |              |
| <b>Name</b>                  |             |             |             | <b>4CQA-O7'-H-OOH-P</b>                      |              |
| <b>Cartesian Coordinates</b> |             |             |             | <b>Frequency and Energy</b>                  |              |
| O                            | 1.57574900  | -0.74592400 | 0.43367600  | Zero-point correction=                       | 0.351066     |
| O                            | 4.10917400  | 2.70116300  | -0.33105000 | (Hartree/Particle)                           |              |
| O                            | 4.44264200  | -1.66574100 | -1.62971800 | Thermal correction to Energy=                | 0.377411     |
| O                            | 3.34822200  | -1.12648000 | 2.53978700  | Thermal correction to Enthalpy=              | 0.378355     |
| O                            | 6.56828900  | 2.06038400  | 0.24735900  | Thermal correction to Gibbs Free Energy=     | 0.290803     |
| O                            | 6.38495100  | 0.05364200  | -0.69496100 | Sum of electronic and zero-point Energies=   | -1448.039110 |

|                              |             |             |             |                                              |              |
|------------------------------|-------------|-------------|-------------|----------------------------------------------|--------------|
| O                            | 0.60751000  | -2.45485200 | -0.66409300 | Sum of electronic and thermal Energies=      | -1448.012766 |
| O                            | -6.68344400 | -1.49911900 | -0.68008400 | Sum of electronic and thermal Enthalpies=    | -1448.011822 |
| O                            | -7.06914600 | 0.67238800  | 0.86697800  | Sum of electronic and thermal Free Energies= | -            |
| C                            | 4.35713500  | 1.31411500  | -0.19963200 | 1448.099373                                  |              |
| C                            | 2.88712400  | -1.27960000 | 0.16510900  |                                              |              |
| C                            | 3.58500800  | 0.64385000  | -1.34425800 |                                              |              |
| C                            | 3.86498800  | 0.80613600  | 1.16943200  |                                              |              |
| C                            | 3.34464900  | -0.86814100 | -1.24199600 |                                              |              |
| C                            | 3.78744200  | -0.71829700 | 1.25900200  |                                              |              |
| C                            | 5.86318100  | 1.05757700  | -0.27365600 |                                              |              |
| C                            | 0.51348600  | -1.43179200 | -0.03632800 |                                              |              |
| C                            | -0.74755000 | -0.75071500 | 0.32914000  |                                              |              |
| C                            | -1.91583600 | -1.26628700 | -0.07028000 |                                              |              |
| C                            | -3.24469400 | -0.71903000 | 0.20282900  |                                              |              |
| C                            | -4.34456100 | -1.36679300 | -0.35935600 |                                              |              |
| C                            | -3.44068200 | 0.42680000  | 1.01056900  |                                              |              |
| C                            | -5.62780700 | -0.88324200 | -0.13895000 |                                              |              |
| C                            | -4.70746400 | 0.90788400  | 1.24020700  |                                              |              |
| C                            | -5.82629600 | 0.26694200  | 0.66872700  |                                              |              |
| H                            | 2.84947100  | -2.36770500 | 0.22638400  |                                              |              |
| H                            | 4.05988800  | 0.87198600  | -2.30155600 |                                              |              |
| H                            | 2.60828200  | 1.13490600  | -1.34264900 |                                              |              |
| H                            | 2.86363800  | 1.22524400  | 1.30768200  |                                              |              |
| H                            | 4.50346500  | 1.18781700  | 1.97126200  |                                              |              |
| H                            | 2.53542500  | -1.11516000 | -1.93296000 |                                              |              |
| H                            | 4.77925800  | -1.16120300 | 1.13154500  |                                              |              |
| H                            | 4.62932000  | 3.17786300  | 0.32706400  |                                              |              |
| H                            | 5.25898300  | -1.22966600 | -1.34846300 |                                              |              |
| H                            | 2.43539100  | -0.83198500 | 2.64230700  |                                              |              |
| H                            | 7.51107400  | 1.82905000  | 0.22622100  |                                              |              |
| H                            | -0.66226500 | 0.15855700  | 0.91113000  |                                              |              |
| H                            | -1.88915000 | -2.17889200 | -0.66087800 |                                              |              |
| H                            | -4.21126200 | -2.24644800 | -0.97884600 |                                              |              |
| H                            | -2.59212300 | 0.92507800  | 1.46174300  |                                              |              |
| H                            | -4.87937300 | 1.77689100  | 1.86588000  |                                              |              |
| H                            | -7.48403300 | -1.03170500 | -0.39458100 |                                              |              |
| H                            | -7.25517400 | 1.54818000  | 0.23478400  |                                              |              |
| H                            | -5.32275300 | 2.40973400  | -1.08865200 |                                              |              |
| O                            | -7.15184200 | 2.43235800  | -0.71616200 |                                              |              |
| O                            | -6.11045500 | 1.95730800  | -1.43932700 |                                              |              |
| <b>Name</b>                  |             |             |             | <b>4CQA-HA-O6'-H-OOH-W</b>                   |              |
| <b>Cartesian Coordinates</b> |             |             |             | <b>Frequency and Energy</b>                  |              |
| O                            | 1.59867800  | -0.63393600 | 0.57558700  | Zero-point correction=                       | 0.337497     |
| O                            | 4.21240100  | 2.62928200  | -0.52755900 | (Hartree/Particle)                           |              |
| O                            | 4.40172800  | -1.81580500 | -1.45312300 | Thermal correction to Energy=                | 0.363317     |
| O                            | 3.44573400  | -0.91172000 | 2.65479500  | Thermal correction to Enthalpy=              | 0.364261     |
| O                            | 6.69862700  | 1.97006800  | -0.43528200 | Thermal correction to Gibbs Free Energy=     | 0.278305     |
| O                            | 6.33882400  | -0.21814400 | -0.66604200 | Sum of electronic and zero-point Energies=   | -1447.625496 |
| O                            | 0.52594500  | -2.39025200 | -0.32795600 | Sum of electronic and thermal Energies=      | -1447.599677 |



|                              |             |             |             |                                              |              |
|------------------------------|-------------|-------------|-------------|----------------------------------------------|--------------|
| O                            | -6.74594100 | -1.00861800 | -0.24254500 | Sum of electronic and thermal Enthalpies=    | -1447.598733 |
| O                            | -6.91679000 | 1.35334400  | 1.10612700  | Sum of electronic and thermal Free Energies= | -            |
| C                            | 4.43270800  | 1.23349400  | -0.34476200 | 1447.684689                                  |              |
| C                            | 2.87769600  | -1.25045100 | 0.32164200  |                                              |              |
| C                            | 3.55742600  | 0.50446400  | -1.37517300 |                                              |              |
| C                            | 4.01286300  | 0.86056300  | 1.09036600  |                                              |              |
| C                            | 3.29870600  | -0.98559000 | -1.13080400 |                                              |              |
| C                            | 3.85271500  | -0.63911000 | 1.31954900  |                                              |              |
| C                            | 5.95110400  | 0.96970100  | -0.50909800 |                                              |              |
| C                            | 0.49504500  | -1.30024200 | 0.20575300  |                                              |              |
| C                            | -0.72015400 | -0.53603000 | 0.53362100  |                                              |              |
| C                            | -1.92110300 | -1.01916500 | 0.19257600  |                                              |              |
| C                            | -3.21375400 | -0.38367700 | 0.44122200  |                                              |              |
| C                            | -4.35948700 | -1.00163800 | -0.03551900 |                                              |              |
| C                            | -3.33740300 | 0.83917000  | 1.14791100  |                                              |              |
| C                            | -5.62334400 | -0.43471200 | 0.18416600  |                                              |              |
| C                            | -4.56642000 | 1.41939600  | 1.37152800  |                                              |              |
| C                            | -5.72056000 | 0.79178500  | 0.89531600  |                                              |              |
| H                            | 2.79224600  | -2.32432300 | 0.49135500  |                                              |              |
| H                            | 3.97100900  | 0.63800500  | -2.37828300 |                                              |              |
| H                            | 2.58645900  | 1.00840700  | -1.35171000 |                                              |              |
| H                            | 3.04895800  | 1.34564500  | 1.27696800  |                                              |              |
| H                            | 4.73561300  | 1.26591100  | 1.80368900  |                                              |              |
| H                            | 2.47522800  | -1.29426900 | -1.77844400 |                                              |              |
| H                            | 4.80989800  | -1.14797600 | 1.19047500  |                                              |              |
| H                            | 5.08844100  | 3.03889800  | -0.44178400 |                                              |              |
| H                            | 5.21152300  | -1.33734000 | -1.15853300 |                                              |              |
| H                            | 2.59828400  | -0.47230300 | 2.80242500  |                                              |              |
| H                            | -0.57772900 | 0.40982000  | 1.04119000  |                                              |              |
| H                            | -1.96089300 | -1.97443300 | -0.32528600 |                                              |              |
| H                            | -4.30316200 | -1.93632000 | -0.58279900 |                                              |              |
| H                            | -2.45076000 | 1.33339600  | 1.52647900  |                                              |              |
| H                            | -4.66056100 | 2.35375000  | 1.91086400  |                                              |              |
| H                            | -7.07751700 | -0.48263400 | -1.14175000 |                                              |              |
| H                            | -7.61181000 | 0.77993900  | 0.74395000  |                                              |              |
| H                            | -5.34008500 | 0.76127400  | -2.40402200 |                                              |              |
| O                            | -7.15088300 | 0.35073100  | -2.15682500 |                                              |              |
| O                            | -6.08850100 | 1.16134800  | -1.92555500 |                                              |              |
| <b>Name</b>                  |             |             |             | <b>4CQA-HA-O7'-H-OOH-W</b>                   |              |
| <b>Cartesian Coordinates</b> |             |             |             | <b>Frequency and Energy</b>                  |              |
| O                            | 1.61468800  | -0.72053700 | 0.40059400  | Zero-point correction=                       | 0.337308     |
| O                            | 4.20034300  | 2.72167200  | -0.10145900 | (Hartree/Particle)                           |              |
| O                            | 4.51666100  | -1.53035500 | -1.67126700 | Thermal correction to Energy=                | 0.363148     |
| O                            | 3.38590000  | -1.26706500 | 2.48651100  | Thermal correction to Enthalpy=              | 0.364092     |
| O                            | 6.69281400  | 2.08498000  | 0.01679300  | Thermal correction to Gibbs Free Energy=     | 0.278026     |
| O                            | 6.38618000  | -0.04070000 | -0.58152000 | Sum of electronic and zero-point Energies=   | -1447.625553 |
| O                            | 0.62094400  | -2.35827300 | -0.77481600 | Sum of electronic and thermal Energies=      | -1447.599714 |
| O                            | -6.66415100 | -1.40657200 | -0.57534500 | Sum of electronic and thermal Enthalpies=    | -1447.598770 |
| O                            | -6.99865500 | 0.78192700  | 1.02462100  | Sum of electronic and thermal Free Energies= | -            |

|                              |                             |             |             |                                                         |
|------------------------------|-----------------------------|-------------|-------------|---------------------------------------------------------|
| C                            | 4.44009600                  | 1.31731500  | -0.11702200 | 1447.684836                                             |
| C                            | 2.91902800                  | -1.26428700 | 0.10786500  |                                                         |
| C                            | 3.62097500                  | 0.73765600  | -1.27964900 |                                                         |
| C                            | 3.96913500                  | 0.72980200  | 1.22746900  |                                                         |
| C                            | 3.38521000                  | -0.77605200 | -1.27100800 |                                                         |
| C                            | 3.83868400                  | -0.79001100 | 1.22548200  |                                                         |
| C                            | 5.96893800                  | 1.10087500  | -0.25210600 |                                                         |
| C                            | 0.54439400                  | -1.35950600 | -0.09072700 |                                                         |
| C                            | -0.70553100                 | -0.68909200 | 0.31481300  |                                                         |
| C                            | -1.88242600                 | -1.17496800 | -0.09803900 |                                                         |
| C                            | -3.20063300                 | -0.62665200 | 0.21833300  |                                                         |
| C                            | -4.31681200                 | -1.26861200 | -0.31582100 |                                                         |
| C                            | -3.36920700                 | 0.51625400  | 1.03717600  |                                                         |
| C                            | -5.59217800                 | -0.78712600 | -0.04915200 |                                                         |
| C                            | -4.62692000                 | 0.99997700  | 1.30229100  |                                                         |
| C                            | -5.76307300                 | 0.35887000  | 0.77031000  |                                                         |
| H                            | 2.85528100                  | -2.35290400 | 0.11163300  |                                                         |
| H                            | 4.06969600                  | 1.02611600  | -2.23384100 |                                                         |
| H                            | 2.63925600                  | 1.21733200  | -1.22095500 |                                                         |
| H                            | 2.98617000                  | 1.16389500  | 1.43833900  |                                                         |
| H                            | 4.65038900                  | 1.03907400  | 2.02476500  |                                                         |
| H                            | 2.59186900                  | -0.99675300 | -1.98849800 |                                                         |
| H                            | 4.81258200                  | -1.25583300 | 1.06365300  |                                                         |
| H                            | 5.06145300                  | 3.12529400  | 0.09345000  |                                                         |
| H                            | 5.30503000                  | -1.08693300 | -1.27852400 |                                                         |
| H                            | 2.51602700                  | -0.88227900 | 2.65547800  |                                                         |
| H                            | -0.60466800                 | 0.18793700  | 0.94175100  |                                                         |
| H                            | -1.87929300                 | -2.05995100 | -0.72945500 |                                                         |
| H                            | -4.20291000                 | -2.14420100 | -0.94480900 |                                                         |
| H                            | -2.50639400                 | 1.01614600  | 1.45838200  |                                                         |
| H                            | -4.77908300                 | 1.87410900  | 1.92433200  |                                                         |
| H                            | -7.47143500                 | -0.97345800 | -0.25595800 |                                                         |
| H                            | -7.33787500                 | 1.37603200  | 0.18094200  |                                                         |
| H                            | -5.54475200                 | 2.30131600  | -1.28907600 |                                                         |
| O                            | -7.37062300                 | 2.01995200  | -0.98004900 |                                                         |
| O                            | -6.20152700                 | 1.62477100  | -1.53567600 |                                                         |
| <b>Name</b>                  | <b>4CQA-A-O6'-H-OOH-W</b>   |             |             |                                                         |
| <b>Cartesian Coordinates</b> | <b>Frequency and Energy</b> |             |             |                                                         |
| O                            | 1.68574300                  | -0.46180000 | 0.43491000  | Zero-point correction= 0.324773                         |
| O                            | 4.62119400                  | 2.51578600  | -0.83755900 | (Hartree/Particle)                                      |
| O                            | 4.61900700                  | -2.00580800 | -1.11980900 | Thermal correction to Energy= 0.347744                  |
| O                            | 3.27854700                  | -0.48191900 | 2.68800900  | Thermal correction to Enthalpy= 0.348688                |
| O                            | 7.01905200                  | 1.73977000  | -0.54292500 | Thermal correction to Gibbs Free Energy= 0.268946       |
| O                            | 6.52876500                  | -0.43322000 | -0.27153400 | Sum of electronic and zero-point Energies= -1447.196836 |
| O                            | 0.59501500                  | -2.32388800 | -0.21466000 | Sum of electronic and thermal Energies= -1447.173865    |
| O                            | -6.63328600                 | -1.23081800 | 0.08155500  | Sum of electronic and thermal Enthalpies= -1447.172921  |
| O                            | -6.88326700                 | 1.51948000  | 0.62092300  | Sum of electronic and thermal Free Energies= -          |
| C                            | 4.71752900                  | 1.15294400  | -0.45568300 | 1447.252663                                             |
| C                            | 2.95819100                  | -1.14651100 | 0.38212800  |                                                         |

|                       |             |             |             |                                                         |
|-----------------------|-------------|-------------|-------------|---------------------------------------------------------|
| C                     | 3.89006400  | 0.32683200  | -1.45513300 |                                                         |
| C                     | 4.12448800  | 1.00816300  | 0.95861000  |                                                         |
| C                     | 3.53968800  | -1.10873600 | -1.03921500 |                                                         |
| C                     | 3.85568500  | -0.43209100 | 1.38601400  |                                                         |
| C                     | 6.23795800  | 0.77697900  | -0.43083600 |                                                         |
| C                     | 0.57266300  | -1.16527900 | 0.12671300  |                                                         |
| C                     | -0.63155200 | -0.33120700 | 0.28216100  |                                                         |
| C                     | -1.85118600 | -0.86537500 | 0.08812000  |                                                         |
| C                     | -3.14474100 | -0.21839900 | 0.21716500  |                                                         |
| C                     | -4.30181800 | -0.97042800 | 0.02410500  |                                                         |
| C                     | -3.28710400 | 1.15388900  | 0.55145100  |                                                         |
| C                     | -5.59322200 | -0.43844400 | 0.17089600  |                                                         |
| C                     | -4.52773600 | 1.71973900  | 0.67870300  |                                                         |
| C                     | -5.73905600 | 0.97568300  | 0.49652900  |                                                         |
| H                     | 2.80655400  | -2.18563000 | 0.67590100  |                                                         |
| H                     | 4.40025600  | 0.30160600  | -2.42229800 |                                                         |
| H                     | 2.95342500  | 0.87818900  | -1.59076800 |                                                         |
| H                     | 3.17635900  | 1.55875100  | 0.96008200  |                                                         |
| H                     | 4.78886600  | 1.48568100  | 1.68414800  |                                                         |
| H                     | 2.76263100  | -1.48444600 | -1.71278800 |                                                         |
| H                     | 4.79488600  | -0.98392500 | 1.44422200  |                                                         |
| H                     | 5.55564200  | 2.79556500  | -0.84171800 |                                                         |
| H                     | 5.42075600  | -1.52246600 | -0.79289100 |                                                         |
| H                     | 2.39708700  | -0.10319100 | 2.60365000  |                                                         |
| H                     | -0.47320000 | 0.70100200  | 0.56762700  |                                                         |
| H                     | -1.87167100 | -1.91726700 | -0.19166000 |                                                         |
| H                     | -4.23057900 | -2.02508000 | -0.22345500 |                                                         |
| H                     | -2.40262600 | 1.76300700  | 0.70210500  |                                                         |
| H                     | -4.64378400 | 2.76842600  | 0.92979400  |                                                         |
| H                     | -7.58455300 | -0.78098200 | -0.34819800 |                                                         |
| H                     | -7.66773000 | 1.25445300  | -0.63025700 |                                                         |
| O                     | -8.56580000 | -0.34787500 | -0.98337700 |                                                         |
| O                     | -8.15264900 | 0.86901200  | -1.44351400 |                                                         |
| <b>Name</b>           |             |             |             | <b>5CQA-O6'-H-OOH-P</b>                                 |
| Cartesian Coordinates |             |             |             | Frequency and Energy                                    |
| O                     | -1.23061200 | -0.56911100 | -0.46198600 | Zero-point correction= 0.351323                         |
| O                     | -5.10258600 | -0.01401900 | 2.38278300  | (Hartree/Particle)                                      |
| O                     | -2.94414600 | -2.75440900 | -0.22848600 | Thermal correction to Energy= 0.377508                  |
| O                     | -5.20762900 | -0.70044100 | -2.13186300 | Thermal correction to Enthalpy= 0.378452                |
| O                     | -4.93392800 | 2.38781100  | 1.37650900  | Thermal correction to Gibbs Free Energy= 0.292101       |
| O                     | -5.29001900 | 1.65328400  | -0.69318300 | Sum of electronic and zero-point Energies= -1448.039688 |
| O                     | -0.88137200 | 1.64883400  | -0.38735500 | Sum of electronic and thermal Energies= -1448.013503    |
| O                     | 5.99317100  | -1.60598000 | -0.54649000 | Sum of electronic and thermal Enthalpies= -1448.012558  |
| O                     | 7.49649700  | 0.62170500  | -0.52708100 | Sum of electronic and thermal Free Energies= -          |
| C                     | -4.66395700 | 0.05237700  | 1.03952200  | 1448.098909                                             |
| C                     | -2.65401300 | -0.35727900 | -0.45670200 |                                                         |
| C                     | -3.13216300 | -0.10338800 | 0.96802600  |                                                         |
| C                     | -5.36555600 | -1.10207900 | 0.31116400  |                                                         |
| C                     | -3.27095500 | -1.62885800 | -1.02524900 |                                                         |

|                       |             |             |             |                                                         |
|-----------------------|-------------|-------------|-------------|---------------------------------------------------------|
| C                     | -4.79935600 | -1.51789300 | -1.05350400 |                                                         |
| C                     | -5.01702800 | 1.42431200  | 0.46028400  |                                                         |
| C                     | -0.44482600 | 0.52502300  | -0.42612500 |                                                         |
| C                     | 0.98269800  | 0.14954700  | -0.44481600 |                                                         |
| C                     | 1.91506100  | 1.10842100  | -0.41422700 |                                                         |
| C                     | 3.36622200  | 0.92210300  | -0.43595400 |                                                         |
| C                     | 3.96991000  | -0.32837400 | -0.47399500 |                                                         |
| C                     | 4.18857700  | 2.07269000  | -0.42617200 |                                                         |
| C                     | 5.36655600  | -0.44213300 | -0.50168800 |                                                         |
| C                     | 5.56756400  | 1.99047500  | -0.45776100 |                                                         |
| C                     | 6.17011800  | 0.73555000  | -0.49464100 |                                                         |
| H                     | -2.88012300 | 0.48577500  | -1.11513400 |                                                         |
| H                     | -2.88135700 | -0.96989900 | 1.58455900  |                                                         |
| H                     | -2.64074600 | 0.77845100  | 1.38690300  |                                                         |
| H                     | -6.43348800 | -0.89084600 | 0.21607900  |                                                         |
| H                     | -5.25837200 | -1.95747400 | 0.98256900  |                                                         |
| H                     | -2.92042300 | -1.76651600 | -2.05357700 |                                                         |
| H                     | -5.17957600 | -2.51941200 | -1.26773000 |                                                         |
| H                     | -4.73576500 | 0.73308100  | 2.87081500  |                                                         |
| H                     | -1.98496700 | -2.84478000 | -0.21736000 |                                                         |
| H                     | -5.28068000 | 0.21230400  | -1.82090800 |                                                         |
| H                     | -5.10715700 | 3.24388200  | 0.95248000  |                                                         |
| H                     | 1.21240500  | -0.90810000 | -0.49156000 |                                                         |
| H                     | 1.57205800  | 2.13956600  | -0.37464600 |                                                         |
| H                     | 3.39099300  | -1.24535100 | -0.48883300 |                                                         |
| H                     | 3.71627600  | 3.04867800  | -0.39640600 |                                                         |
| H                     | 6.18756800  | 2.87832800  | -0.45124700 |                                                         |
| H                     | 6.03246200  | -2.01912100 | 0.48186300  |                                                         |
| H                     | 7.71839100  | -0.32218700 | -0.57580500 |                                                         |
| H                     | 4.83244700  | -0.75373200 | 2.26066000  |                                                         |
| O                     | 6.00080500  | -2.12077900 | 1.75856700  |                                                         |
| O                     | 5.79568600  | -0.83759700 | 2.14712300  |                                                         |
| <b>Name</b>           |             |             |             | <b>5CQA-O7'-H-OOH-P</b>                                 |
| Cartesian Coordinates |             |             |             | Frequency and Energy                                    |
| O                     | -1.38172800 | -0.06200300 | 0.39723000  | Zero-point correction= 0.350826                         |
| O                     | -5.69234200 | 1.64674200  | 1.57713400  | (Hartree/Particle)                                      |
| O                     | -3.10281500 | -1.82245200 | 1.78891000  | Thermal correction to Energy= 0.377265                  |
| O                     | -4.98840800 | -1.85099600 | -1.27908800 | Thermal correction to Enthalpy= 0.378209                |
| O                     | -5.40895300 | 2.78623400  | -0.74748200 | Thermal correction to Gibbs Free Energy= 0.290530       |
| O                     | -5.31851600 | 0.83869600  | -1.81862500 | Sum of electronic and zero-point Energies= -1448.039019 |
| O                     | -0.76881600 | -0.85759100 | -1.61739700 | Sum of electronic and thermal Energies= -1448.012580    |
| O                     | 5.55382800  | 0.54016400  | 2.27874600  | Sum of electronic and thermal Enthalpies= -1448.011636  |
| O                     | 7.36435900  | -0.43102900 | 0.54564800  | Sum of electronic and thermal Free Energies= -          |
| C                     | -5.02481700 | 0.86863300  | 0.60294100  | 1448.099315                                             |
| C                     | -2.77465200 | -0.16807800 | 0.04466300  |                                                         |
| C                     | -3.50216500 | 0.90103200  | 0.84477000  |                                                         |
| C                     | -5.57637800 | -0.55613800 | 0.75427600  |                                                         |
| C                     | -3.27529400 | -1.56570600 | 0.40527600  |                                                         |
| C                     | -4.77357000 | -1.69339300 | 0.10814000  |                                                         |

|                       |             |             |             |                                                         |
|-----------------------|-------------|-------------|-------------|---------------------------------------------------------|
| C                     | -5.28366800 | 1.45998100  | -0.78430100 |                                                         |
| C                     | -0.47475700 | -0.44785600 | -0.52347800 |                                                         |
| C                     | 0.89857000  | -0.29135500 | 0.00215300  |                                                         |
| C                     | 1.93918700  | -0.66304000 | -0.75236600 |                                                         |
| C                     | 3.35254200  | -0.58130900 | -0.38482600 |                                                         |
| C                     | 3.77992000  | -0.03450800 | 0.82850200  |                                                         |
| C                     | 4.30178400  | -1.08190200 | -1.30342800 |                                                         |
| C                     | 5.13176800  | 0.01619800  | 1.12238300  |                                                         |
| C                     | 5.64880200  | -1.04050500 | -1.01831100 |                                                         |
| C                     | 6.09062700  | -0.49015800 | 0.19869400  |                                                         |
| H                     | -2.87472800 | -0.01304400 | -1.03217700 |                                                         |
| H                     | -3.35565400 | 0.71541900  | 1.91124900  |                                                         |
| H                     | -3.09826100 | 1.88983900  | 0.60940200  |                                                         |
| H                     | -6.61113900 | -0.59443700 | 0.40520400  |                                                         |
| H                     | -5.58611900 | -0.73545300 | 1.83199400  |                                                         |
| H                     | -2.74236400 | -2.30765600 | -0.19847400 |                                                         |
| H                     | -5.10400900 | -2.62439100 | 0.57453600  |                                                         |
| H                     | -5.43322600 | 2.57048700  | 1.47575000  |                                                         |
| H                     | -2.16628000 | -1.74117100 | 1.99999900  |                                                         |
| H                     | -5.09377300 | -0.97793300 | -1.68076400 |                                                         |
| H                     | -5.51998300 | 3.11864500  | -1.65294100 |                                                         |
| H                     | 0.99922500  | 0.11999700  | 0.99914700  |                                                         |
| H                     | 1.72776500  | -1.07358700 | -1.73675000 |                                                         |
| H                     | 3.07810300  | 0.36343300  | 1.55140700  |                                                         |
| H                     | 3.95554300  | -1.50641600 | -2.23862900 |                                                         |
| H                     | 6.38887400  | -1.43042300 | -1.70854400 |                                                         |
| H                     | 6.52012900  | 0.46209500  | 2.30943700  |                                                         |
| H                     | 7.83511300  | 0.40564700  | 0.01013100  |                                                         |
| H                     | 6.43165100  | 1.60923500  | -1.66125800 |                                                         |
| O                     | 8.00096600  | 1.50641000  | -0.65552200 |                                                         |
| O                     | 6.73013900  | 1.95061600  | -0.79946200 |                                                         |
| <b>Name</b>           |             |             |             | <b>5CQA-HA-O6'-H-OOH-W</b>                              |
| Cartesian Coordinates |             |             |             | Frequency and Energy                                    |
| O                     | 1.30314100  | 0.54650600  | -0.47455900 | Zero-point correction= 0.337567                         |
| O                     | 5.11047200  | 0.18534200  | 2.42918500  | (Hartree/Particle)                                      |
| O                     | 3.06625100  | 2.71778000  | -0.43298100 | Thermal correction to Energy= 0.363318                  |
| O                     | 5.26438700  | 0.38516800  | -2.10898200 | Thermal correction to Enthalpy= 0.364262                |
| O                     | 5.42269900  | -2.23072000 | 1.60314000  | Thermal correction to Gibbs Free Energy= 0.279115       |
| O                     | 5.14295700  | -1.75004100 | -0.55678800 | Sum of electronic and zero-point Energies= -1447.624652 |
| O                     | 0.89719400  | -1.66301700 | -0.42968600 | Sum of electronic and thermal Energies= -1447.598901    |
| O                     | -5.84944400 | 1.80751300  | -0.11739600 | Sum of electronic and thermal Enthalpies= -1447.597957  |
| O                     | -7.44254300 | -0.31259700 | -0.72098400 | Sum of electronic and thermal Free Energies= -          |
| C                     | 4.74076900  | -0.00859800 | 1.06759900  | 1447.683104                                             |
| C                     | 2.72716600  | 0.30542300  | -0.47184900 |                                                         |
| C                     | 3.20805800  | 0.12467500  | 0.96107700  |                                                         |
| C                     | 5.44232600  | 1.08802800  | 0.25019300  |                                                         |
| C                     | 3.36431100  | 1.51820300  | -1.13540000 |                                                         |
| C                     | 4.88868100  | 1.36390500  | -1.15238800 |                                                         |
| C                     | 5.14860800  | -1.44895500 | 0.66563600  |                                                         |

|                       |             |             |             |                                                         |
|-----------------------|-------------|-------------|-------------|---------------------------------------------------------|
| C                     | 0.48976300  | -0.51953900 | -0.44900700 |                                                         |
| C                     | -0.92489600 | -0.10979700 | -0.45664300 |                                                         |
| C                     | -1.88646700 | -1.03832300 | -0.52200900 |                                                         |
| C                     | -3.32869000 | -0.79188600 | -0.54738700 |                                                         |
| C                     | -3.88822700 | 0.45102200  | -0.28547400 |                                                         |
| C                     | -4.18585800 | -1.87744900 | -0.84836000 |                                                         |
| C                     | -5.27575100 | 0.62942200  | -0.34645500 |                                                         |
| C                     | -5.55663800 | -1.72929700 | -0.91438700 |                                                         |
| C                     | -6.11526000 | -0.47673000 | -0.66798700 |                                                         |
| H                     | 2.92828300  | -0.57761100 | -1.07951700 |                                                         |
| H                     | 2.92330400  | 1.01078200  | 1.53455200  |                                                         |
| H                     | 2.72838000  | -0.74552600 | 1.41692700  |                                                         |
| H                     | 6.51195400  | 0.87259400  | 0.18032900  |                                                         |
| H                     | 5.33079500  | 2.00901600  | 0.82936500  |                                                         |
| H                     | 3.00780900  | 1.58875600  | -2.16793400 |                                                         |
| H                     | 5.30340300  | 2.31396900  | -1.49701500 |                                                         |
| H                     | 5.28169900  | -0.70532900 | 2.77572000  |                                                         |
| H                     | 2.10947200  | 2.84131300  | -0.43805300 |                                                         |
| H                     | 5.21684700  | -0.48828000 | -1.65792500 |                                                         |
| H                     | -1.12338200 | 0.95456200  | -0.42803300 |                                                         |
| H                     | -1.58777500 | -2.08221800 | -0.57955000 |                                                         |
| H                     | -3.28306500 | 1.31219600  | -0.02612300 |                                                         |
| H                     | -3.74545100 | -2.85040000 | -1.03672400 |                                                         |
| H                     | -6.20653100 | -2.56317200 | -1.14852900 |                                                         |
| H                     | -6.25101700 | 1.79942600  | 0.90505000  |                                                         |
| H                     | -7.65754300 | 0.61825300  | -0.54641900 |                                                         |
| H                     | -5.28691200 | 0.12621600  | 2.46668900  |                                                         |
| O                     | -6.58215100 | 1.43296100  | 2.11397100  |                                                         |
| O                     | -6.19845700 | 0.13159900  | 2.12308600  |                                                         |
| <b>Name</b>           |             |             |             | <b>5CQA-HA-O7'-H-OOH-W</b>                              |
| Cartesian Coordinates |             |             |             | Frequency and Energy                                    |
| O                     | -1.35552500 | -0.04064500 | 0.36328900  | Zero-point correction= 0.337124                         |
| O                     | -5.52350400 | 2.07139100  | 1.24055200  | (Hartree/Particle)                                      |
| O                     | -3.10675500 | -1.42540700 | 2.11496800  | Thermal correction to Energy= 0.362977                  |
| O                     | -5.05190800 | -1.91271100 | -0.89475200 | Thermal correction to Enthalpy= 0.363921                |
| O                     | -5.61004700 | 2.59652800  | -1.28306800 | Thermal correction to Gibbs Free Energy= 0.278350       |
| O                     | -5.18146400 | 0.50618800  | -1.93021100 | Sum of electronic and zero-point Energies= -1447.625062 |
| O                     | -0.79967800 | -1.43487000 | -1.31189300 | Sum of electronic and thermal Energies= -1447.599209    |
| O                     | 5.57477700  | 0.91729000  | 1.99408800  | Sum of electronic and thermal Enthalpies= -1447.598265  |
| O                     | 7.39460900  | -0.26598800 | 0.34648600  | Sum of electronic and thermal Free Energies= -          |
| C                     | -4.96437400 | 1.05398800  | 0.41528400  | 1447.683836                                             |
| C                     | -2.76144400 | -0.17540500 | 0.05416800  |                                                         |
| C                     | -3.43421600 | 1.07191600  | 0.59957700  |                                                         |
| C                     | -5.55487800 | -0.28268300 | 0.88894500  |                                                         |
| C                     | -3.30709700 | -1.44347500 | 0.70741400  |                                                         |
| C                     | -4.81492100 | -1.55388800 | 0.45747900  |                                                         |
| C                     | -5.29192400 | 1.40766300  | -1.05810600 |                                                         |
| C                     | -0.47526700 | -0.70884600 | -0.39570700 |                                                         |
| C                     | 0.90865400  | -0.42529900 | 0.02968900  |                                                         |

|                       |             |             |             |                                                         |
|-----------------------|-------------|-------------|-------------|---------------------------------------------------------|
| C                     | 1.93572600  | -0.98359300 | -0.62211000 |                                                         |
| C                     | 3.35446800  | -0.77840800 | -0.33104300 |                                                         |
| C                     | 3.79306200  | -0.00784900 | 0.74818000  |                                                         |
| C                     | 4.29712800  | -1.38347300 | -1.19303100 |                                                         |
| C                     | 5.15029400  | 0.16440400  | 0.96155800  |                                                         |
| C                     | 5.64782300  | -1.20985200 | -0.99324200 |                                                         |
| C                     | 6.10165500  | -0.43877500 | 0.09017700  |                                                         |
| H                     | -2.87316300 | -0.24967500 | -1.02850500 |                                                         |
| H                     | -3.24118800 | 1.13608300  | 1.67356200  |                                                         |
| H                     | -3.01369000 | 1.96177200  | 0.12411200  |                                                         |
| H                     | -6.60313500 | -0.35490600 | 0.58688100  |                                                         |
| H                     | -5.53034400 | -0.24916800 | 1.98185700  |                                                         |
| H                     | -2.81851500 | -2.31966900 | 0.27056000  |                                                         |
| H                     | -5.18170100 | -2.38020100 | 1.07098500  |                                                         |
| H                     | -5.68146500 | 2.82286400  | 0.64690600  |                                                         |
| H                     | -2.15847200 | -1.37141000 | 2.28547000  |                                                         |
| H                     | -5.08496200 | -1.07393900 | -1.40994000 |                                                         |
| H                     | 1.02896500  | 0.25237400  | 0.86577900  |                                                         |
| H                     | 1.71760500  | -1.64382000 | -1.45766000 |                                                         |
| H                     | 3.09912100  | 0.46602600  | 1.43186900  |                                                         |
| H                     | 3.94079200  | -1.98272400 | -2.02272900 |                                                         |
| H                     | 6.38386300  | -1.66138900 | -1.64764100 |                                                         |
| H                     | 6.54455400  | 0.90606800  | 2.02396000  |                                                         |
| H                     | 7.68279800  | 0.73170400  | 0.01435600  |                                                         |
| H                     | 6.28923200  | 1.71322900  | -1.78165300 |                                                         |
| O                     | 7.65028500  | 1.94059400  | -0.51591100 |                                                         |
| O                     | 6.34754000  | 2.04771100  | -0.86802900 |                                                         |
| <b>Name</b>           |             |             |             | <b>5CQA-A-O6'-H-OOH-W</b>                               |
| Cartesian Coordinates |             |             |             | Frequency and Energy                                    |
| O                     | -1.39591900 | 0.18711200  | -0.04558900 | Zero-point correction= 0.324212                         |
| O                     | -5.56462300 | 2.34991000  | -0.68947800 | (Hartree/Particle)                                      |
| O                     | -2.70846200 | 0.84016100  | 2.29855700  | Thermal correction to Energy= 0.346428                  |
| O                     | -5.11879700 | -1.67905300 | 1.34890500  | Thermal correction to Enthalpy= 0.347372                |
| O                     | -6.33169100 | 0.57488400  | -2.32657000 | Thermal correction to Gibbs Free Energy= 0.270962       |
| O                     | -5.47459100 | -1.16825200 | -1.20046300 | Sum of electronic and zero-point Energies= -1447.196189 |
| O                     | -0.87685800 | -2.00671900 | -0.03294800 | Sum of electronic and thermal Energies= -1447.173974    |
| O                     | 5.68317000  | 1.72080900  | -0.63674100 | Sum of electronic and thermal Enthalpies= -1447.173030  |
| O                     | 7.40354200  | -0.49143700 | -0.54946200 | Sum of electronic and thermal Free Energies= -          |
| C                     | -5.06139900 | 1.06054600  | -0.37801100 | 1447.249440                                             |
| C                     | -2.81577600 | -0.10028700 | 0.06008700  |                                                         |
| C                     | -3.53075700 | 1.09604500  | -0.54847800 |                                                         |
| C                     | -5.41863600 | 0.75687100  | 1.08601700  |                                                         |
| C                     | -3.15578200 | -0.28011700 | 1.53881000  |                                                         |
| C                     | -4.67006100 | -0.40840500 | 1.74772500  |                                                         |
| C                     | -5.69074300 | 0.05086200  | -1.39607400 |                                                         |
| C                     | -0.52998700 | -0.85130500 | -0.08083000 |                                                         |
| C                     | 0.86038200  | -0.36874300 | -0.17916200 |                                                         |
| C                     | 1.87354100  | -1.25267300 | -0.19368000 |                                                         |
| C                     | 3.30092800  | -0.99427200 | -0.28154200 |                                                         |

|   |             |             |             |
|---|-------------|-------------|-------------|
| C | 3.85167400  | 0.28405800  | -0.35885300 |
| C | 4.18278100  | -2.10471700 | -0.29674900 |
| C | 5.23275200  | 0.50490900  | -0.46914000 |
| C | 5.54172400  | -1.93657700 | -0.38256900 |
| C | 6.14226700  | -0.64348400 | -0.46753800 |
| H | -3.03775600 | -1.02257000 | -0.47716400 |
| H | -3.17951000 | 2.00603400  | -0.05240300 |
| H | -3.28212500 | 1.17651300  | -1.61008900 |
| H | -6.49543600 | 0.58260400  | 1.17030700  |
| H | -5.18073300 | 1.66693000  | 1.64558500  |
| H | -2.68073300 | -1.19820500 | 1.90172600  |
| H | -4.83319300 | -0.33932400 | 2.82922800  |
| H | -6.06014600 | 2.18120400  | -1.51342000 |
| H | -1.83397200 | 1.07233400  | 1.96989400  |
| H | -5.25812700 | -1.63934300 | 0.36970900  |
| H | 1.00623600  | 0.70255200  | -0.23693100 |
| H | 1.58528000  | -2.30096300 | -0.13278800 |
| H | 3.21961800  | 1.16538000  | -0.36075400 |
| H | 3.76071200  | -3.10369500 | -0.23806400 |
| H | 6.21700300  | -2.78501000 | -0.39356000 |
| H | 6.71077900  | 1.96888500  | -0.18963500 |
| H | 7.85003200  | 0.43157000  | 0.53592600  |
| O | 7.72170900  | 2.29461900  | 0.43680400  |
| O | 8.01435000  | 1.19781900  | 1.19478100  |

## References

1. M. G. Evans and M. Polanyi, *Trans. Faraday Soc.*, 1935, **31**, 875-894.
2. H. Eyring, *J. Chem. Phys.*, 1935, **3**, 107-115.
3. D. G. Truhlar, W. L. Hase and J. T. Hynes, *J. Phys. Chem.*, 1983, **87**, 2664-2682.
4. T. Furuncuoglu, I. Ugur, I. Degirmenci and V. Aviyente, *Macromolecules*, 2010, **43**, 1823-1835.
5. E. Vélez, J. Quijano, R. Notario, E. Pabón, J. Murillo, J. Leal, E. Zapata and G. Alarcón, *J. Phys. Org. Chem.*, 2009, **22**, 971-977.
6. E. Pollak and P. Pechukas, *J. Am. Chem. Soc.*, 1978, **100**, 2984-2991.
7. A. Fernández-Ramos, B. A. Ellingson, R. Meana-Pañeda, J. M. Marques and D. G. Truhlar, *Theor. Chem. Acc.*, 2007, **118**, 813-826.
8. C. Eckart, *Phy. Rev.*, 1930, **35**, 1303.
9. R. A. Marcus, *Annu. Rev. Phys. Chem.*, 1964, **15**, 155-196.
10. R. A. Marcus, *Rev. Mod. Phys.*, 1993, **65**, 599.
11. Y. Lu, A. Wang, P. Shi and H. Zhang, *PloS one*, 2017, **12**, e0169773.
12. Y. Lu, A. Wang, P. Shi, H. Zhang and Z. Li, *PloS one*, 2015, **10**, e0133259.
13. S. F. Nelsen, S. C. Blackstock and Y. Kim, *J. Am. Chem. Soc.*, 1987, **109**, 677-682.



14. S. F. Nelsen, M. N. Weaver, Y. Luo, J. R. Pladziewicz, L. K. Ausman, T. L. Jentzsch and J. J. O'Konek, *J. Phys. Chem. A*, 2006, **110**, 11665-11676.
15. A. Galano and J. R. Alvarez-Idaboy, *J. Comput. Chem.*, 2013, **34**, 2430-2445.
16. F. C. Collins and G. E. Kimball, *J. Colloid Sci.*, 1949, **4**, 425-437.
17. M. Von Smoluchowski, *Z. Phys. Chem*, 1917, **92**, 129-168.
18. D. G. Truhlar, *J. Chem. Educ.*, 1985, **62**, 104.
19. A. Einstein, *Ann. Phys.*, 1905, **17**, 549-560.
20. G. G. Stokes, *Mathematical and Physical Papers*, University Press, Cambridge, 1905.
21. A. Galano and J. Raúl Alvarez-Idaboy, *Int. J. Quantum Chem.*, 2019, **119**, e25665.
22. Q. V. Vo, T. V. Gon, M. V. Bay and A. Mechler, *J. Phys. Chem. B*, 2019, **123**, 10672-10679.
23. Q. V. Vo, N. M. Tam, M. Van Bay, N. M. Thong, T. Le Huyen, N. T. Hoa and A. Mechler, *RSC Adv.*, 2020, **10**, 14937-14943.
